# Supplementary material for: Aerophobin-1 from the Marine Sponge Aplysina aerophoba Modulates Osteogenesis in Zebrafish Larvae
Source: MDPI journal article supplement (doi:10.3390/md20020135), 2022-02-11
Supplement: s1 [file s1]

# Supplementary Material

## **Aerophobin-1 from the marine sponge *Aplysina aerophoba* modulates osteogenesis in zebrafish larvae**

Marta Carnovali <sup>1</sup>, Maria Letizia Ciavatta <sup>2</sup>, Ernesto Mollo <sup>2</sup>, Vassilios Roussis<sup>3</sup>, Giuseppe Banfi <sup>1,4</sup>, Marianna Carbone<sup>2,\*</sup>, Massimo Mariotti <sup>1,5\*</sup>

\* Correspondence [massimo.mariotti@unimi.it](mailto:massimo.mariotti@unimi.it); Tel.: +39-0296474369 (M.M.); [mcabone@icb.cnr.it](mailto:mcabone@icb.cnr.it); Tel.: +39-0818675227 (M.C.)

### Table of content:

- S1. <sup>1</sup>H NMR spectrum of aerophobin- 1 (**1**) (400 MHz, MeOD)
- S2. ESI-MS spectrum of aerophobin- 1 (**1**)
- S3. <sup>1</sup>H NMR spectrum of aerophobin- 2 (**2**) (400 MHz, MeOD)
- S4. ESI-MS spectrum of aerophobin- 2 (**2**)
- S5. <sup>1</sup>H NMR spectrum of (+)-aeroplysinin-1 (**3**) (400 MHz, CDCl<sub>3</sub>)
- S6. ESI-MS spectrum of (+)-aeroplysinin-1 (**3**)
- S7. <sup>1</sup>H NMR spectrum of compound **4** (400 MHz, MeOD)
- S8. ESI-MS spectrum of compound **4**
- S9. <sup>1</sup>H NMR spectrum of compound **5** (400 MHz, MeOD)
- S10. ESI-MS spectrum of compound **5**
- S11. <sup>1</sup>H NMR spectrum of fistularin- 3 (**6**) (600 MHz, MeOD)
- S12. ESI-MS spectrum of fistularin- 3 (**6**)
- S13. <sup>1</sup>H NMR spectrum of LL-PAA216 (**7**) (400 MHz, MeOD)
- S14. ESI-MS spectrum of LL-PAA216 (**7**)
- S15. <sup>1</sup>H NMR spectrum of uranidine (**8**) (400 MHz, MeOD)
- S16. ESI-MS spectrum of uranidine (**8**)

S1

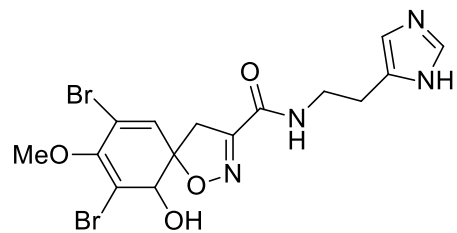

aerophobin-1 (1)

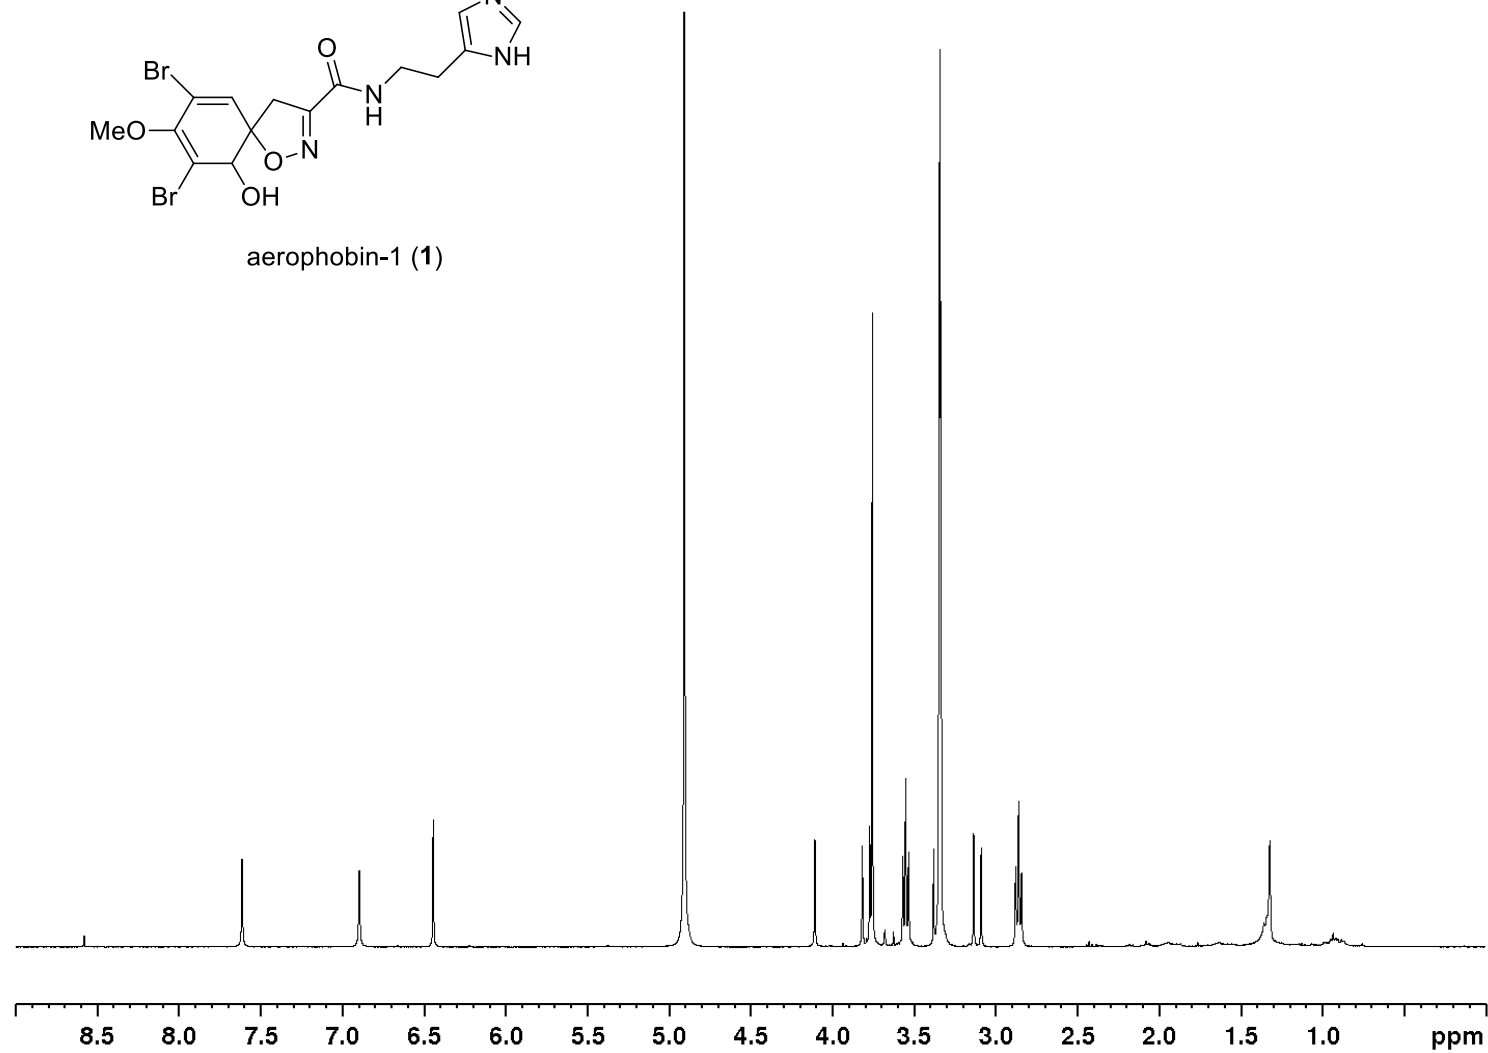

<sup>1</sup>H NMR spectrum of aerophobin- 1 (1) (400 MHz, MeOD)

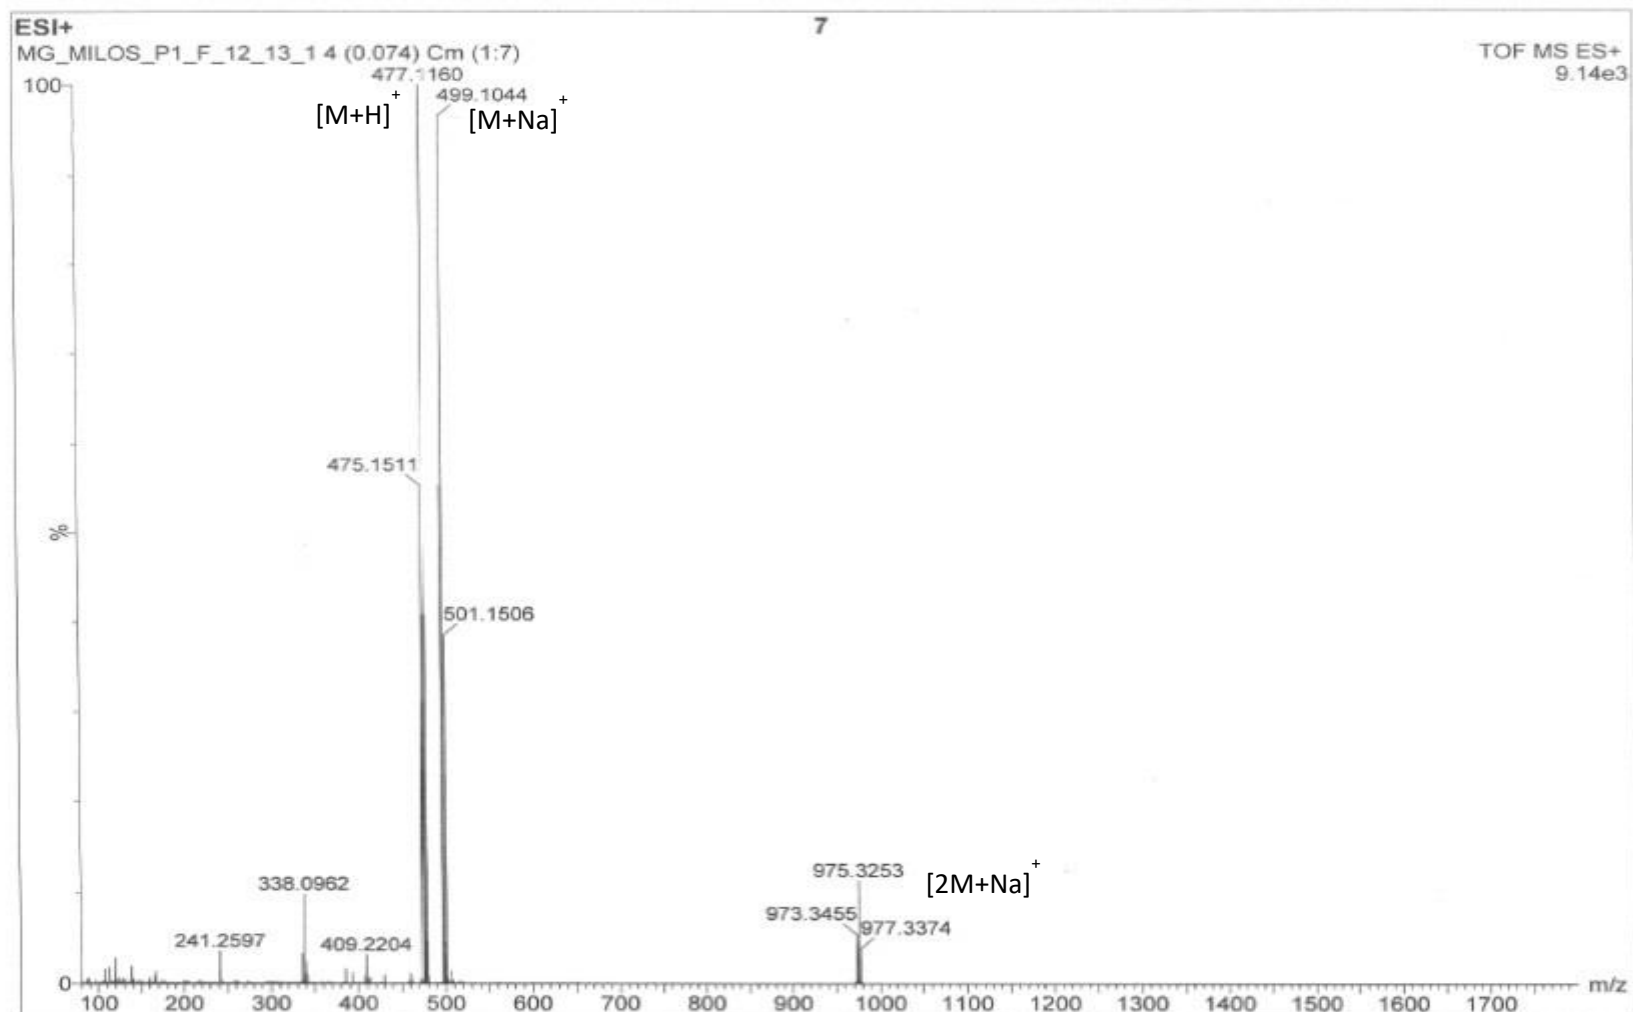

ESI-MS spectrum of aerophobin- 1 (1)

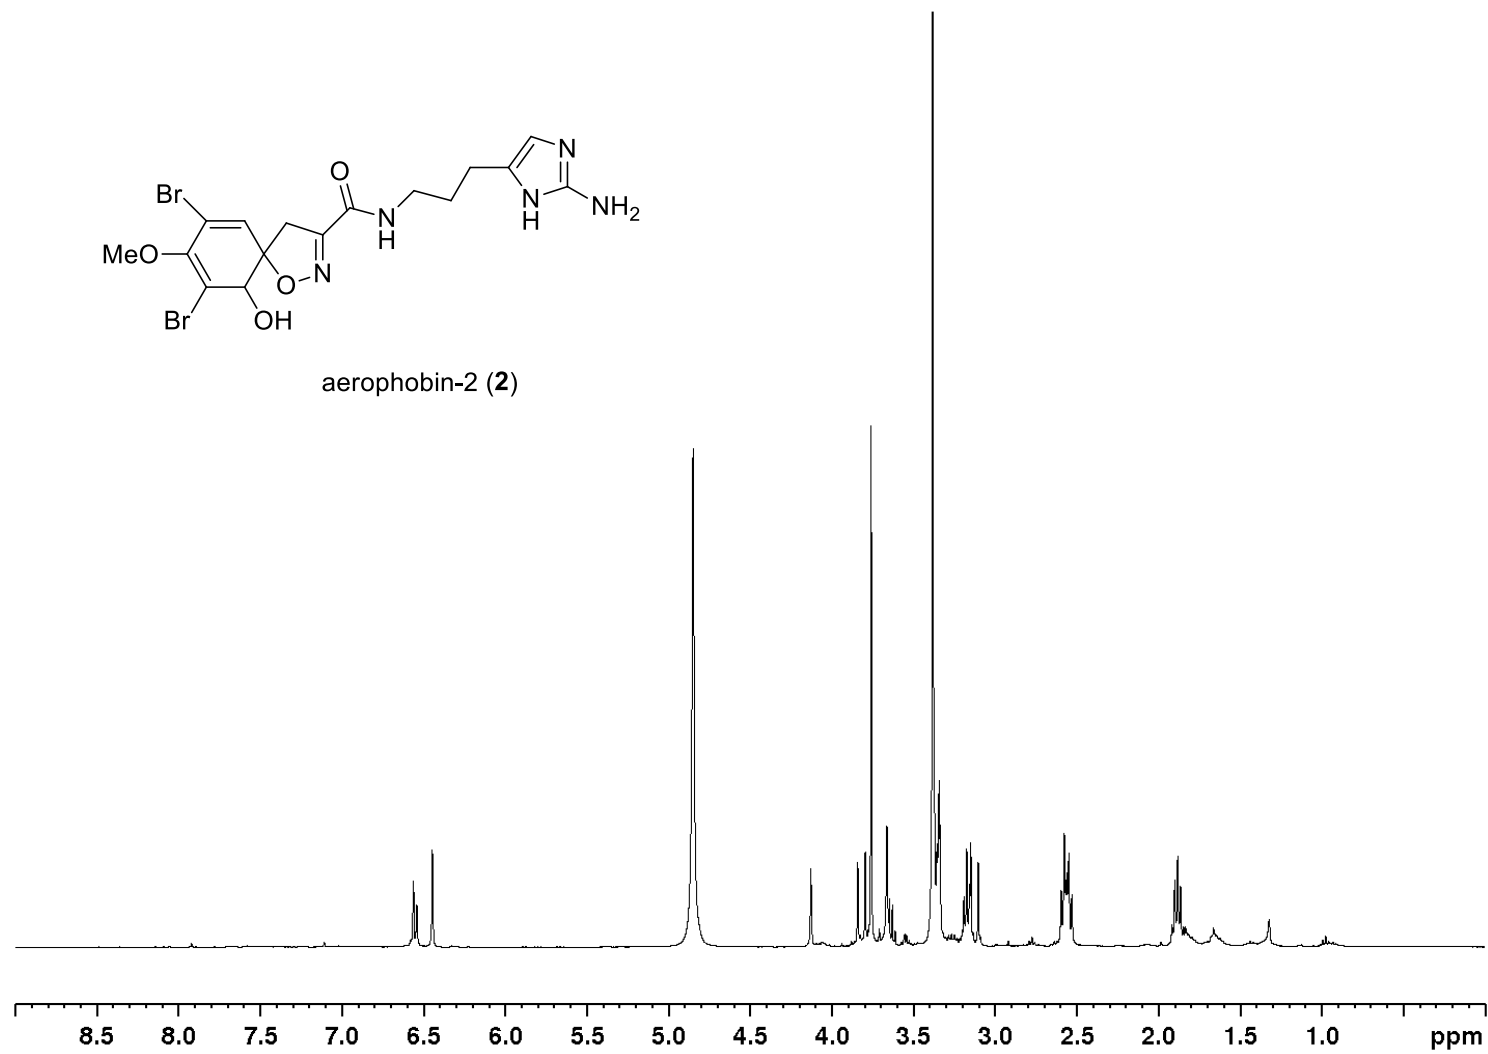

<sup>1</sup>H NMR spectrum of aerophobin- 2 (2) (400 MHz, MeOD)

S4

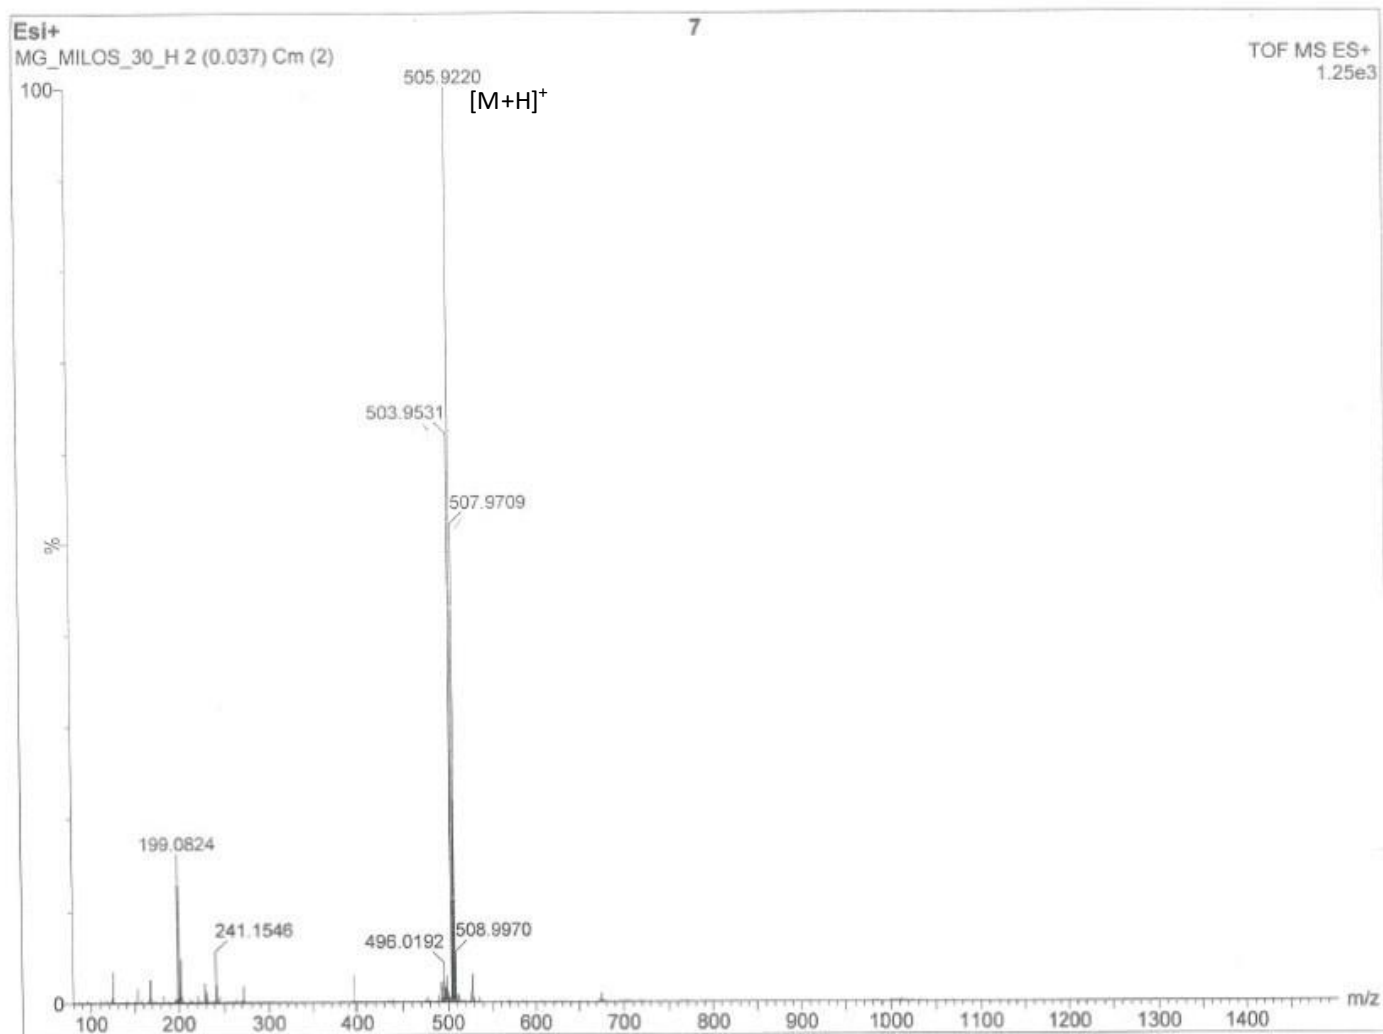

ESI-MS spectrum of aerophobin- 2 (2)

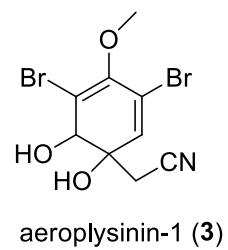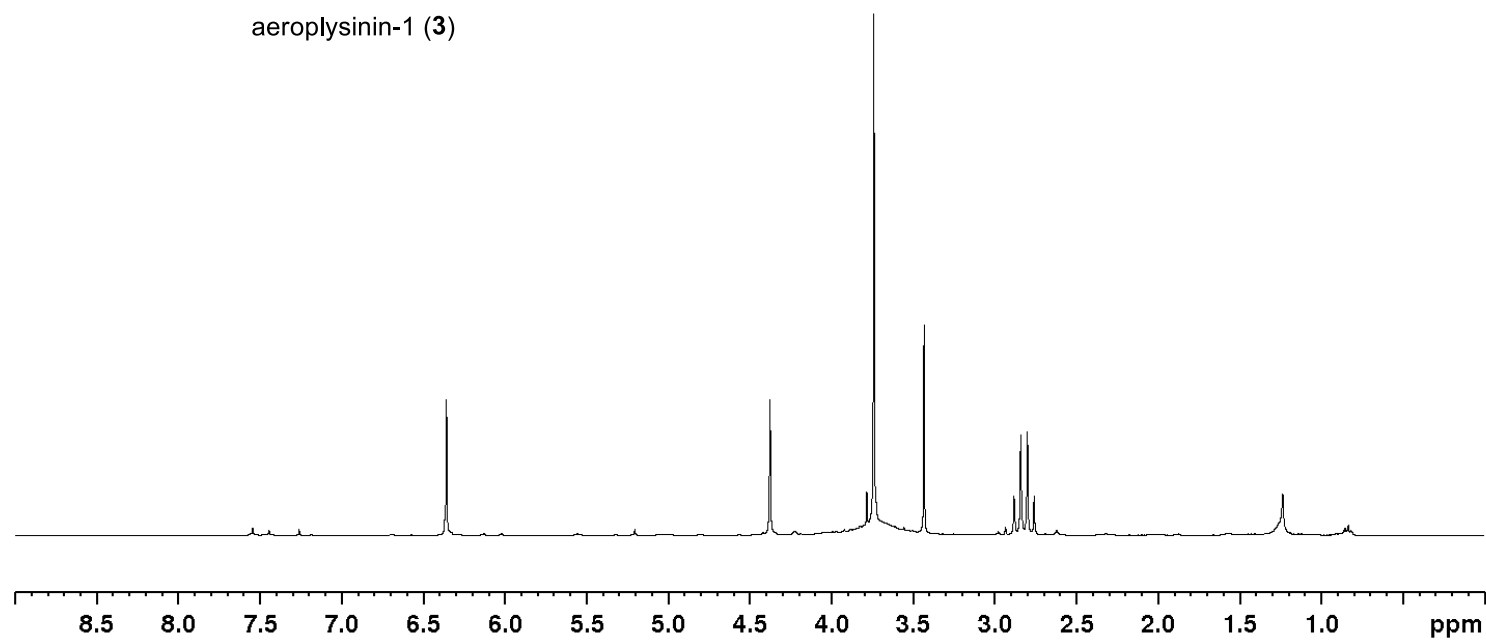

$^1\text{H}$  NMR spectrum of (+)-aeroplysinin-1 (**3**) (400 MHz,  $\text{CDCl}_3$ )

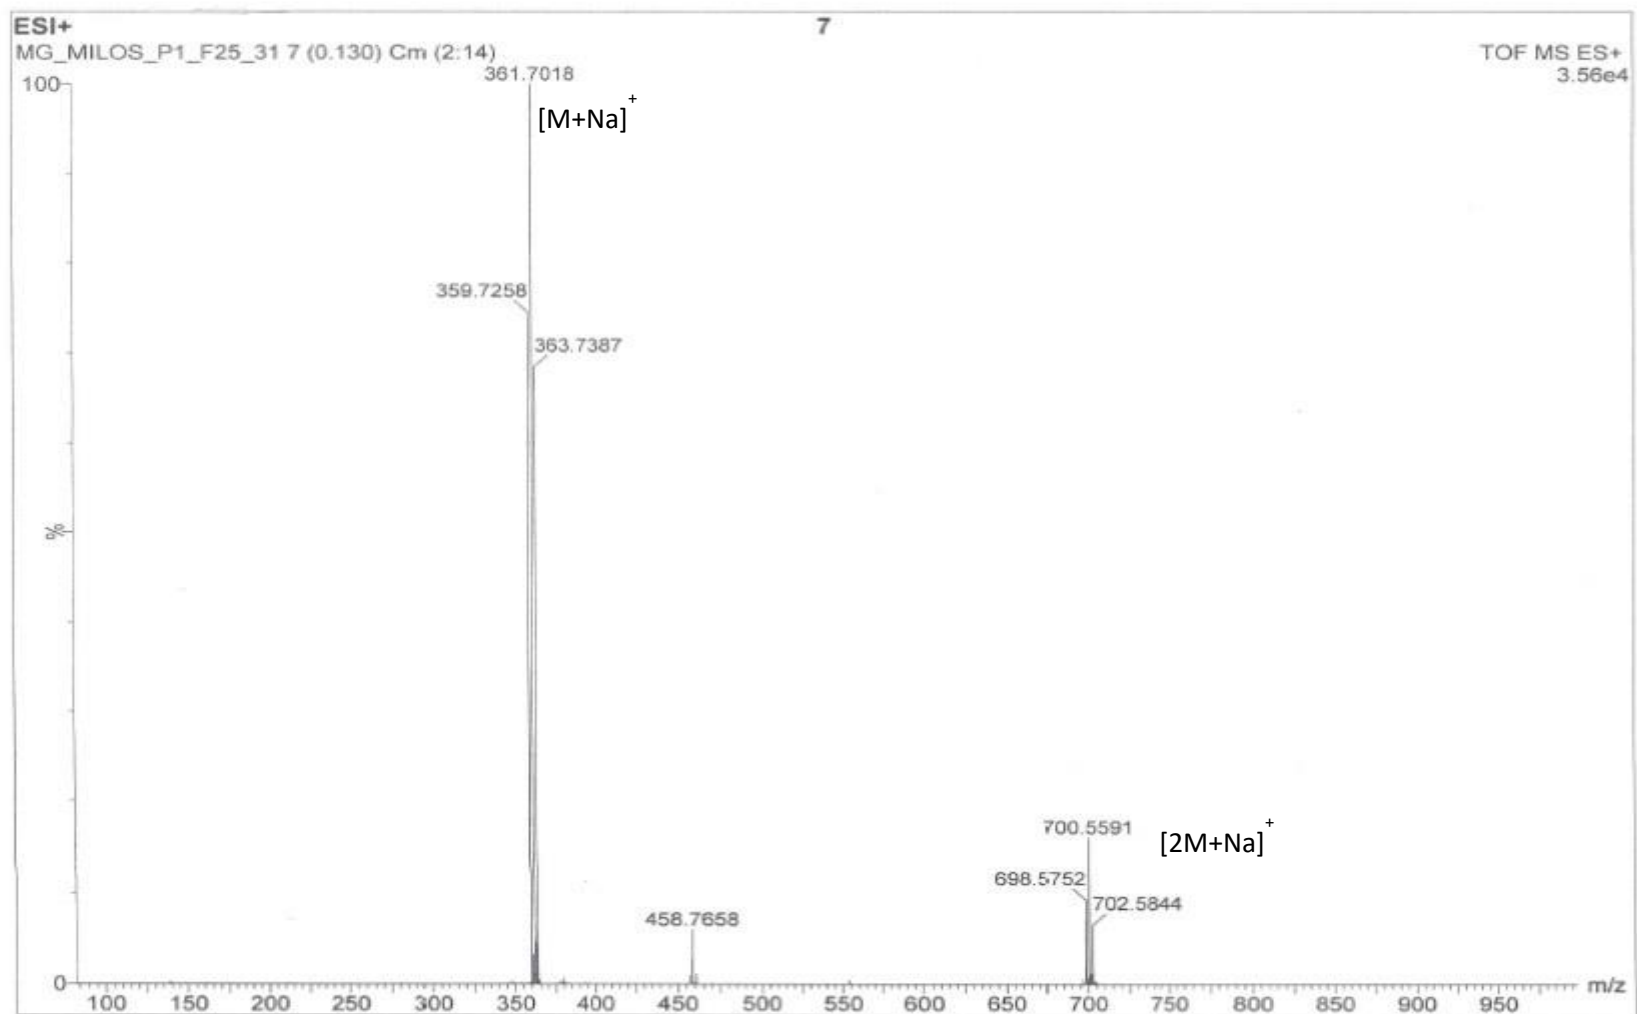

ESI-MS spectrum of (+)-aeroplysinin-1 (3)

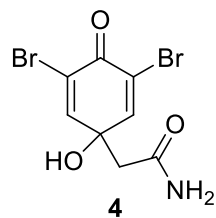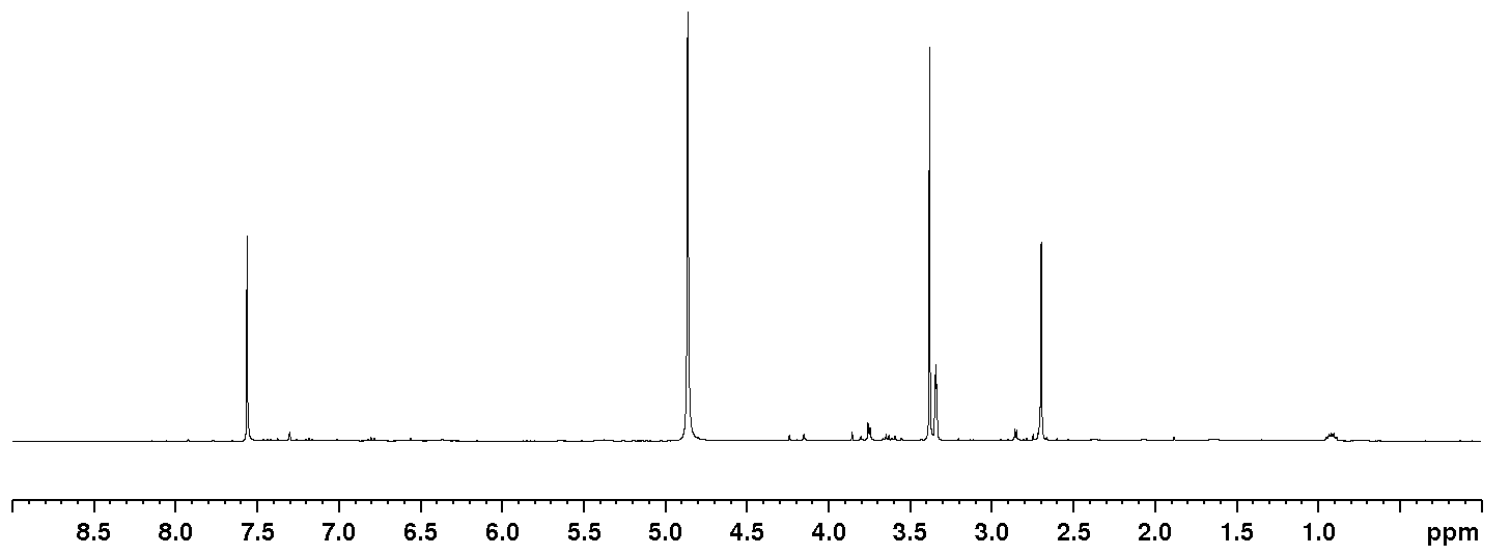

$^1\text{H}$  NMR spectrum of compound **4** (400 MHz, MeOD)



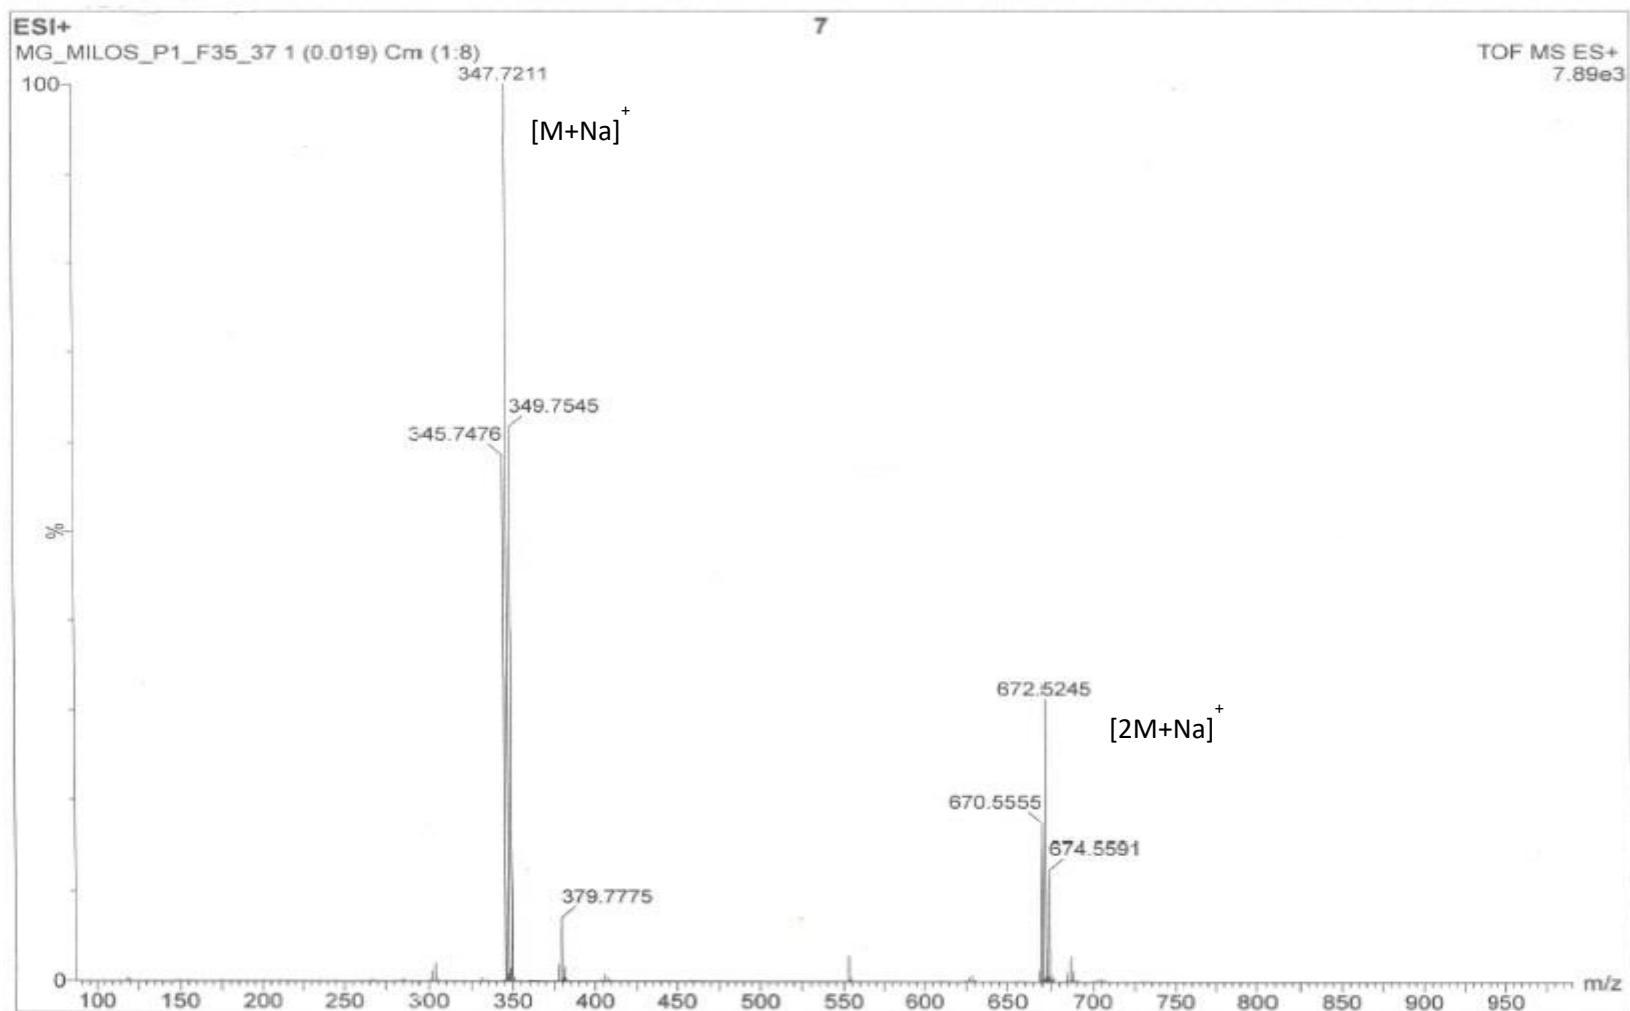

ESI-MS spectrum of compound 4

S9

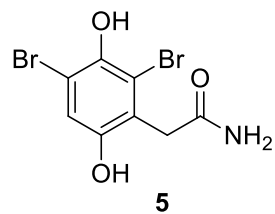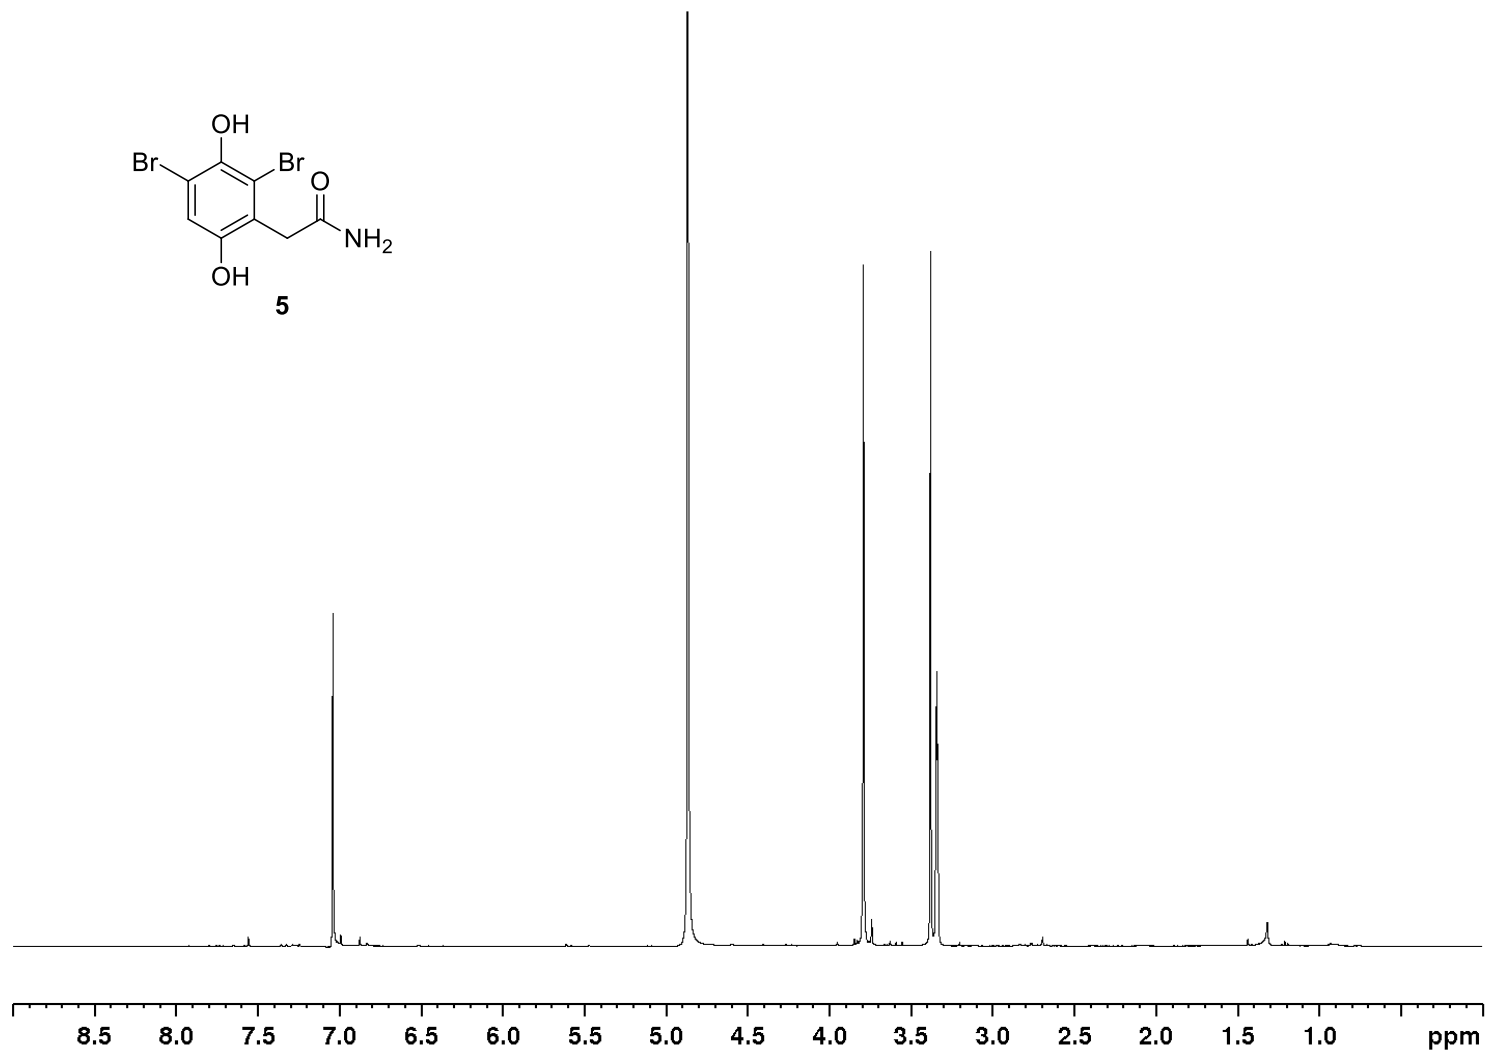

<sup>1</sup>H NMR spectrum of compound 5 (400 MHz, MeOD)

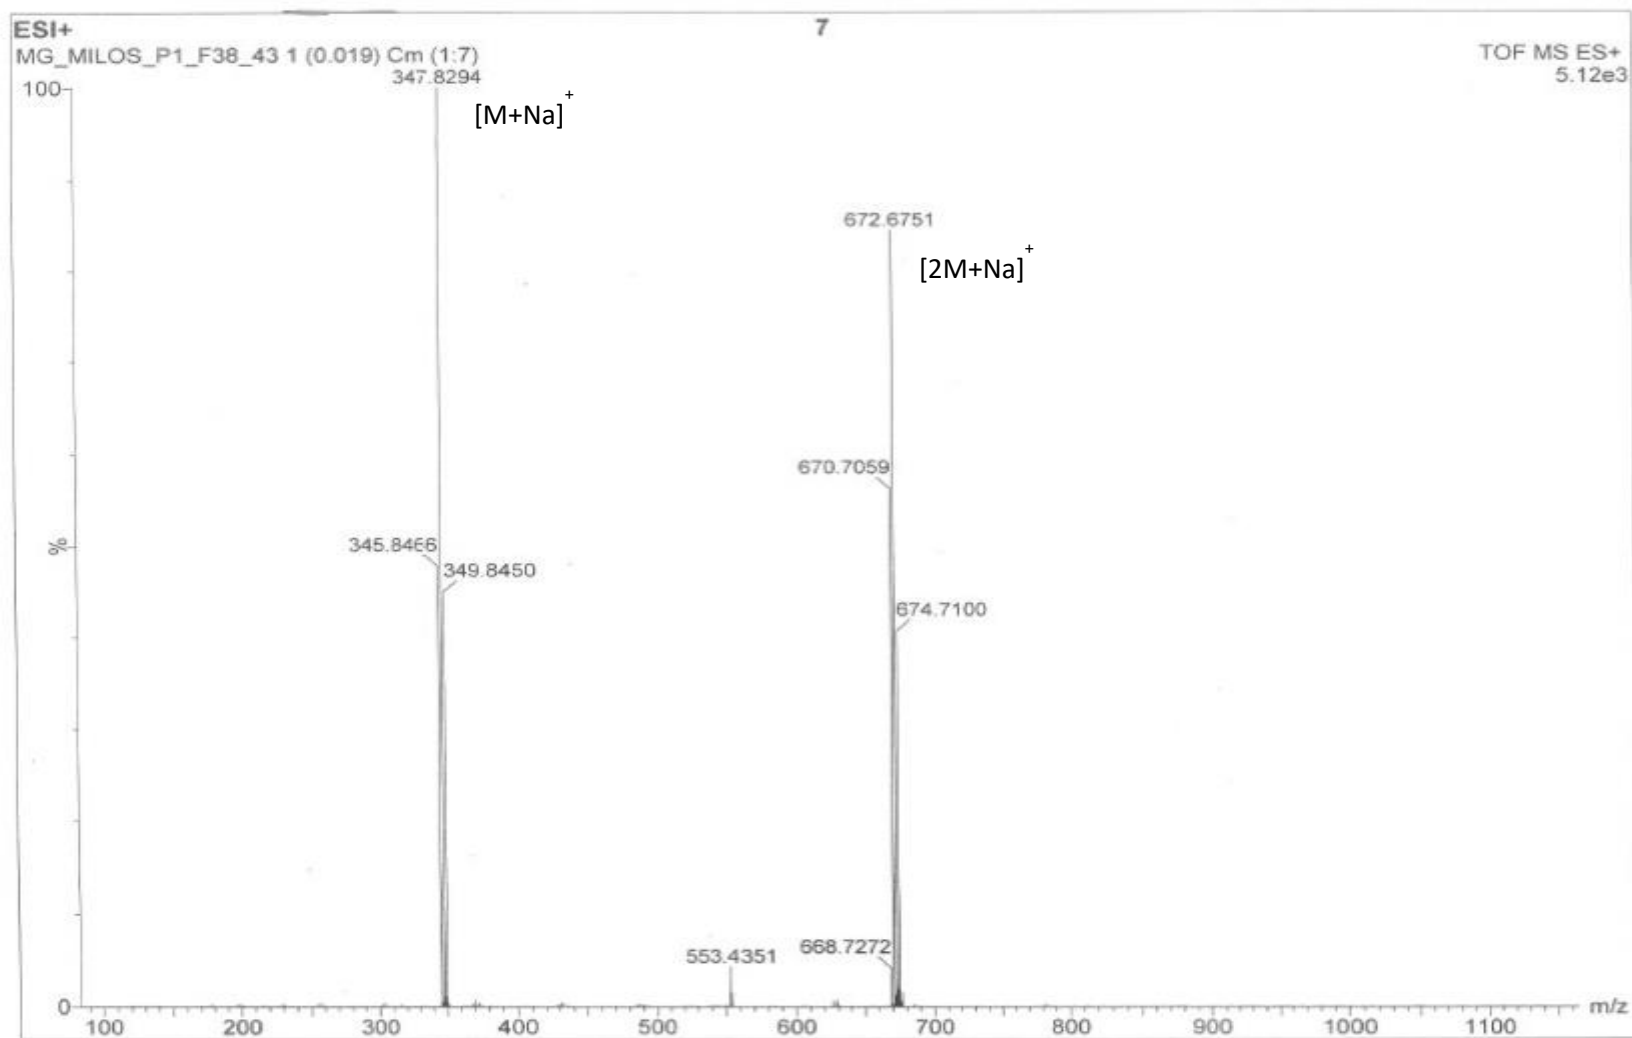

ESI-MS spectrum of compound 5

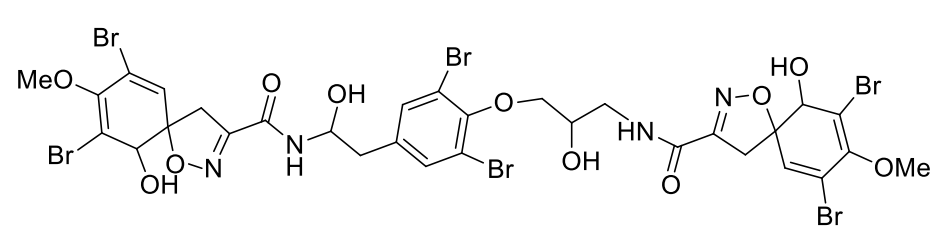fistularin-3 (**6**)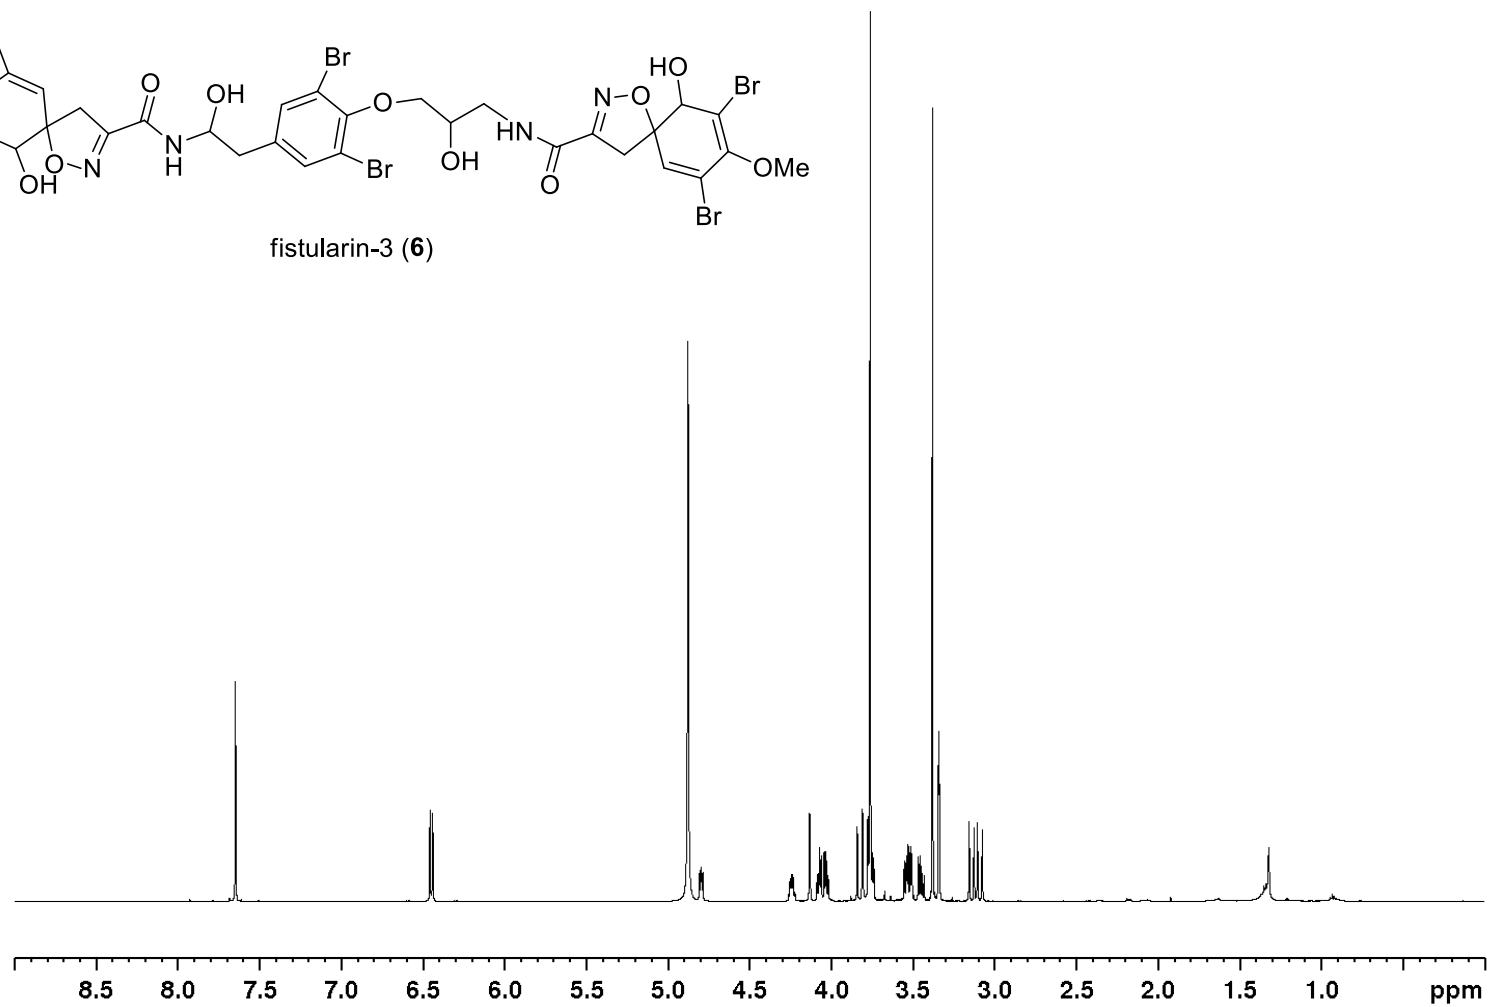<sup>1</sup>H NMR spectrum of fistularin- 3 (**6**) (600 MHz, MeOD)

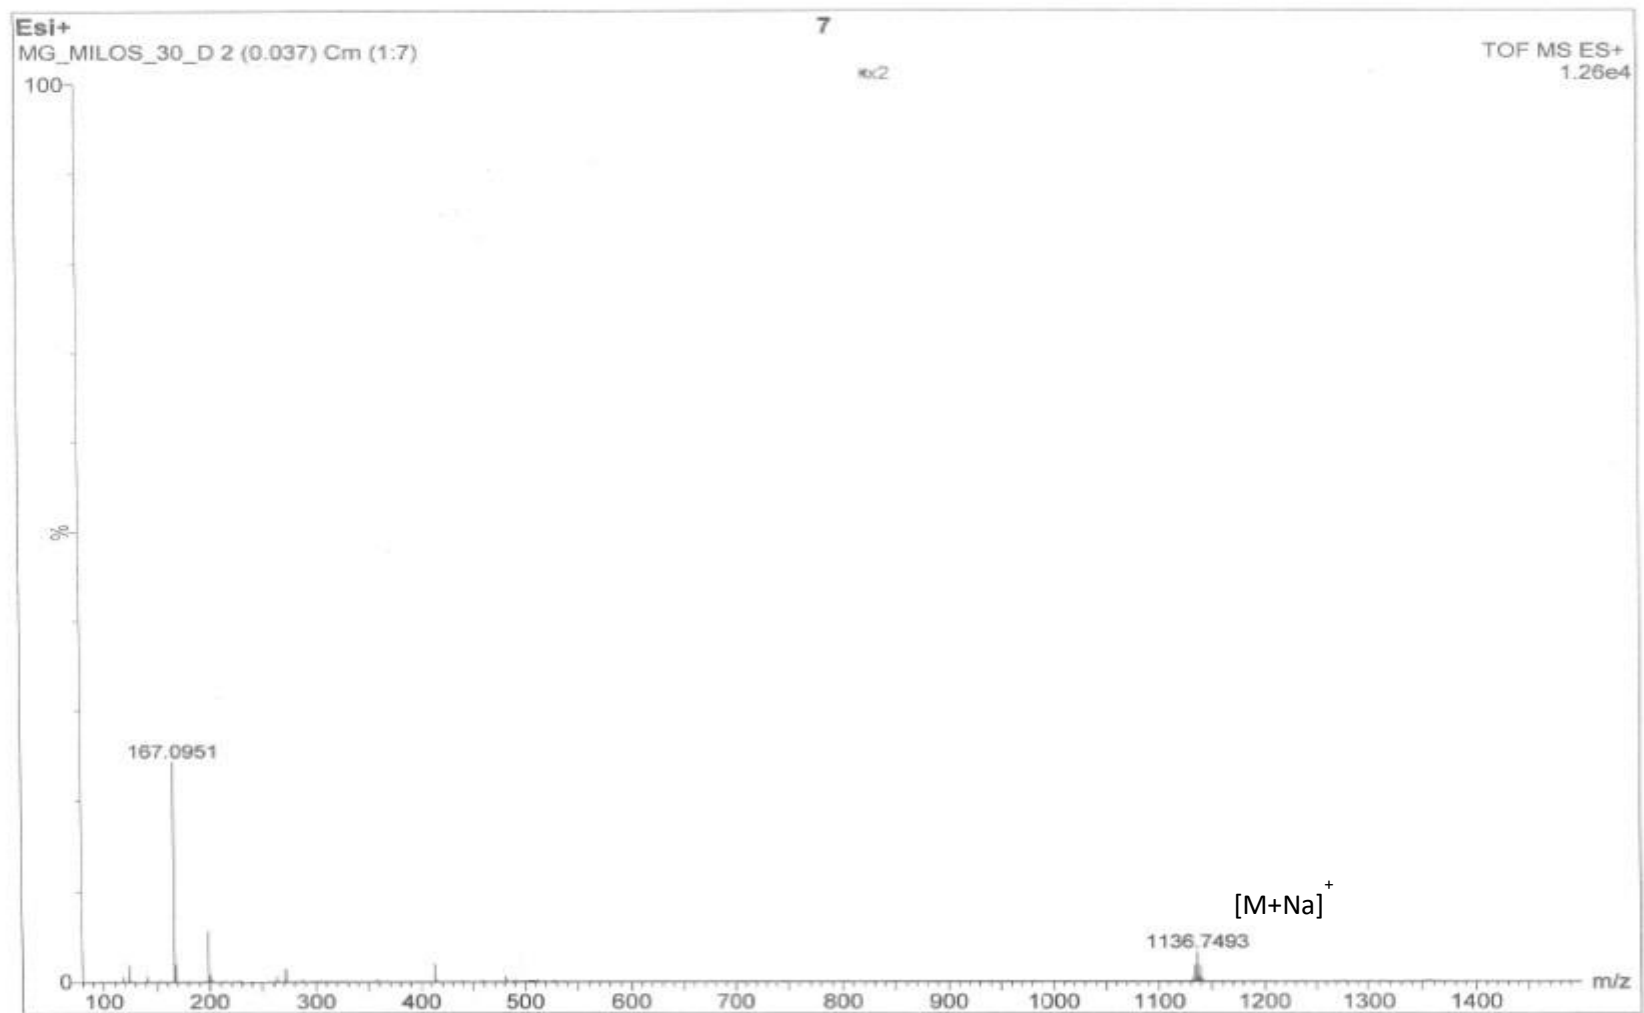

ESI-MS spectrum of fistularin- 3 (6)

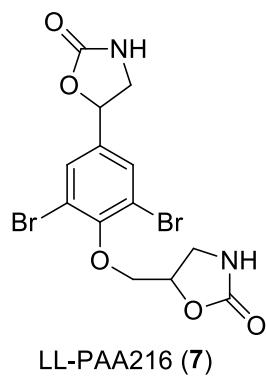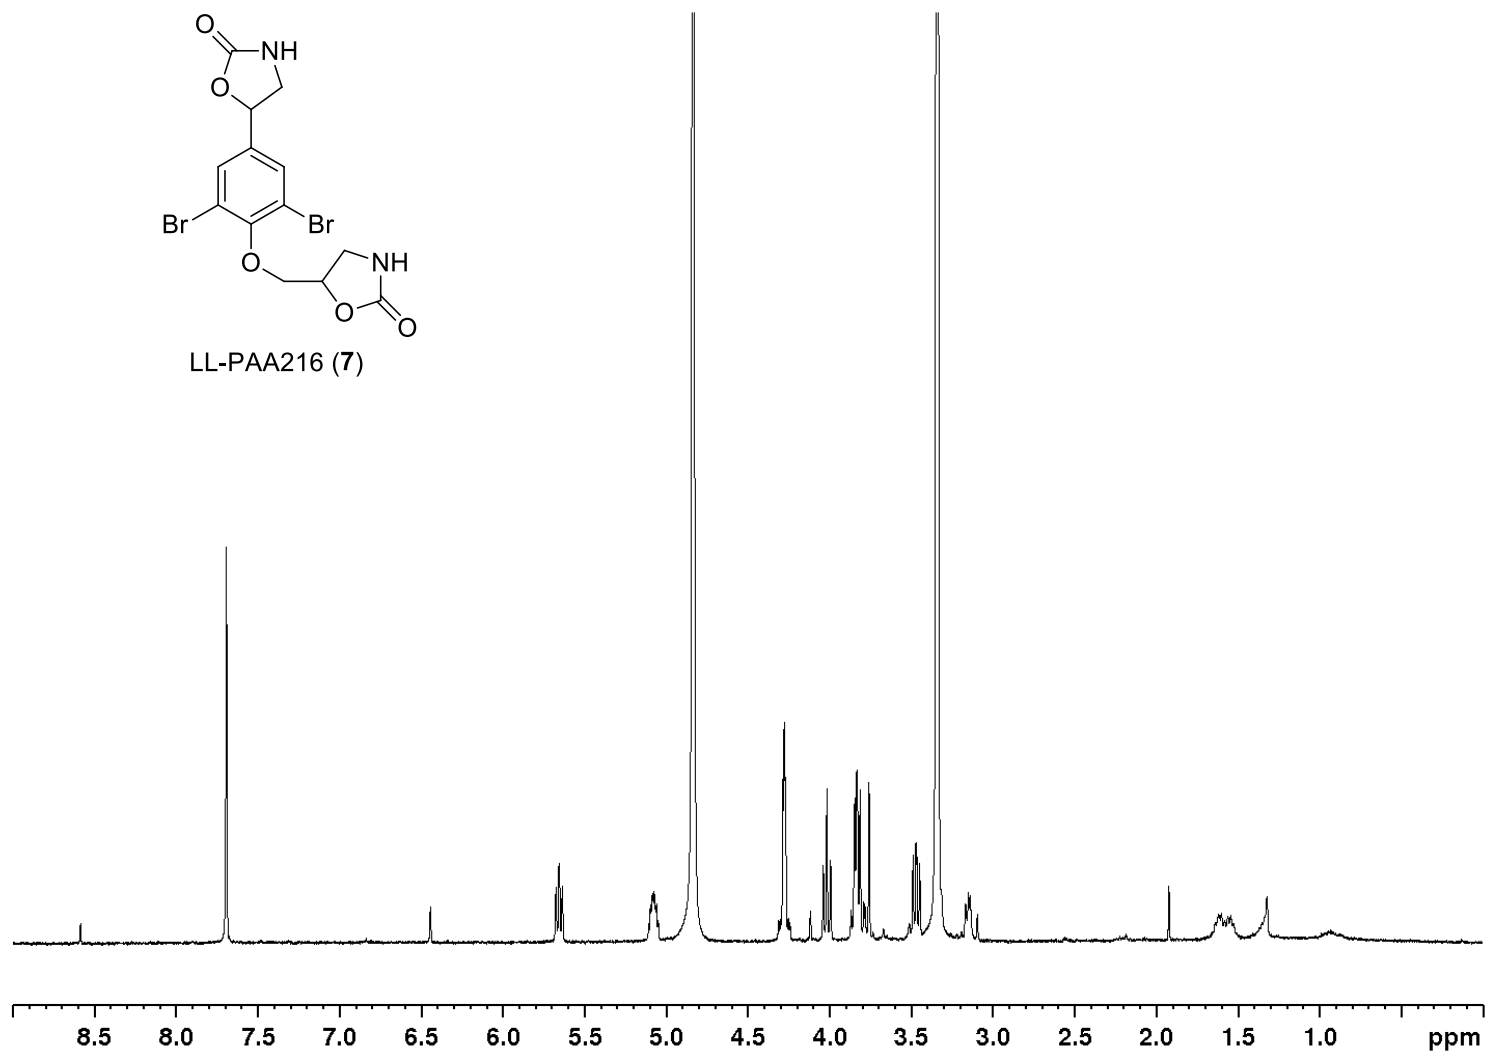

<sup>1</sup>H NMR spectrum of LL-PAA216 (7) (400 MHz, MeOD)

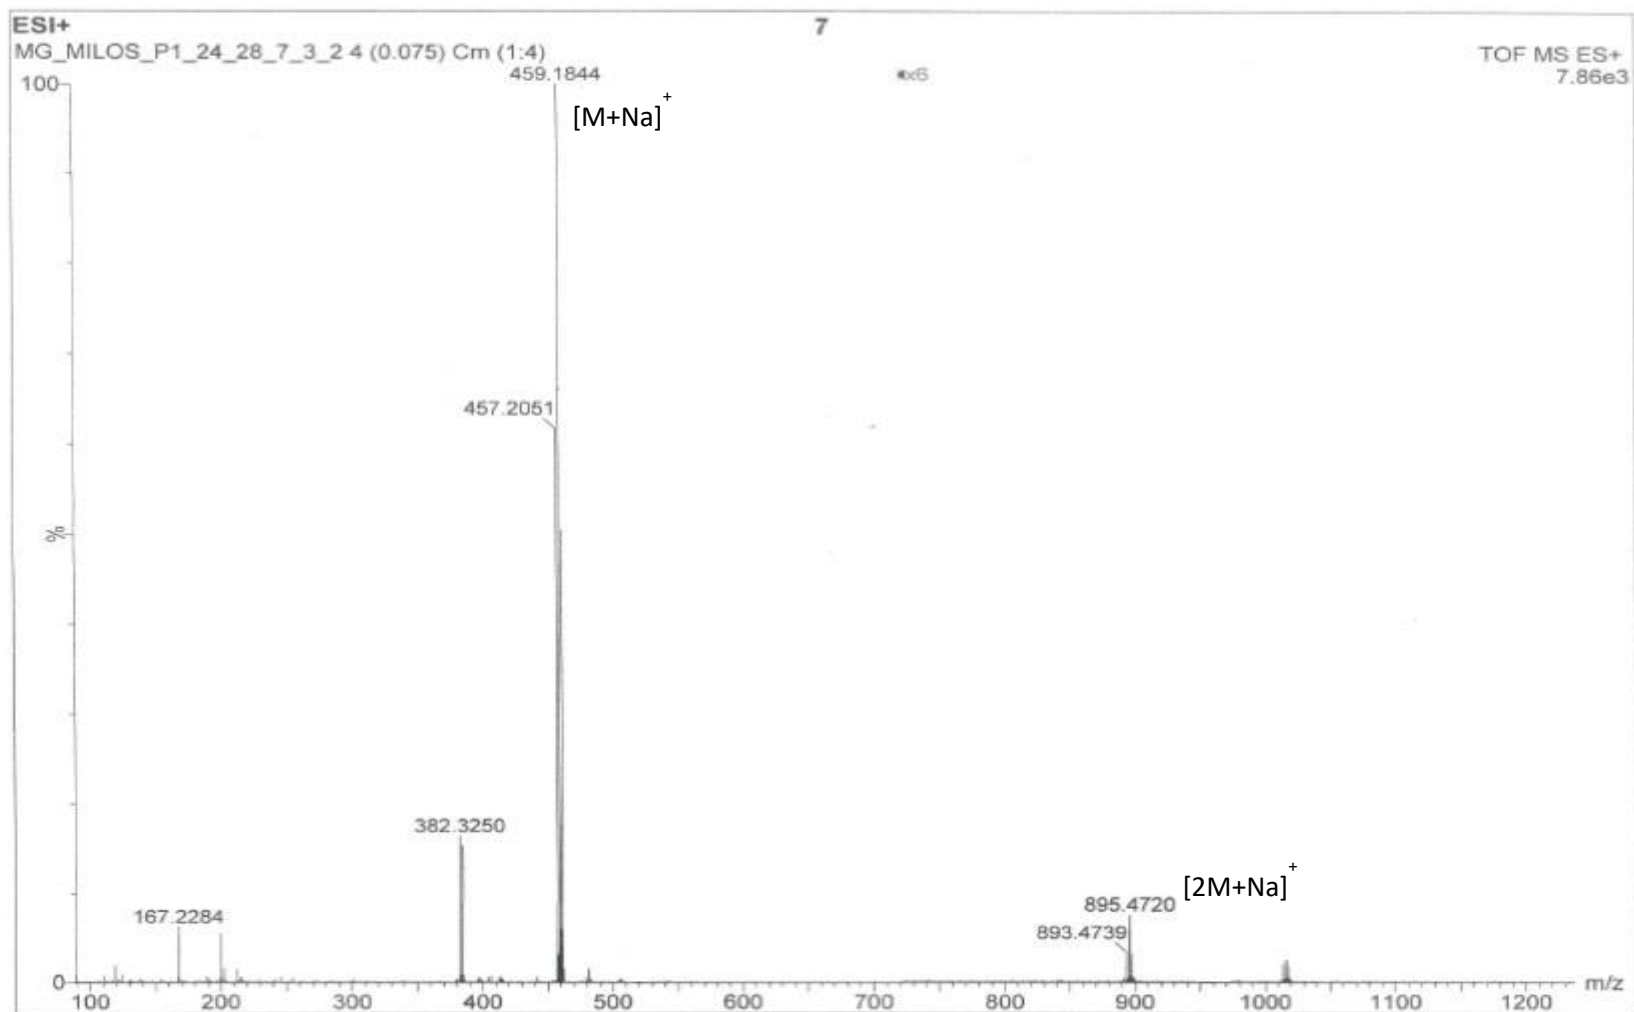

ESI-MS spectrum of LL-PAA216 (7)

S15

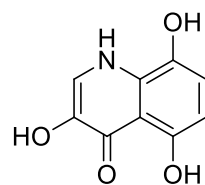

uranidine (8)

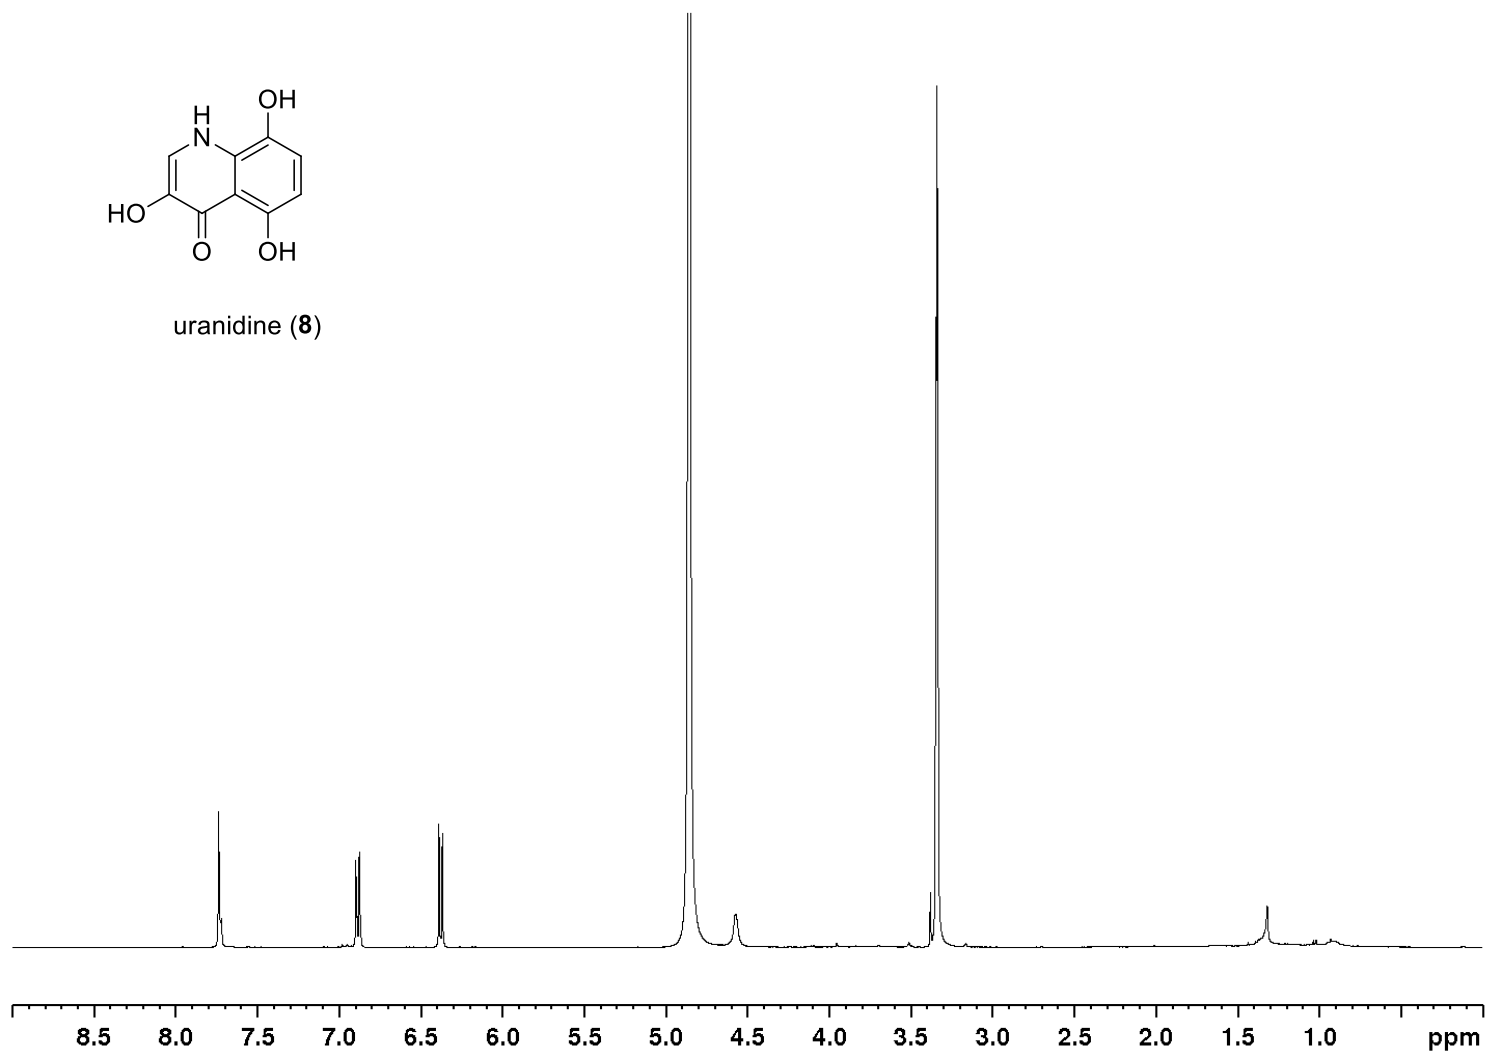

<sup>1</sup>H NMR spectrum of uranidine (8) (400 MHz, MeOD)



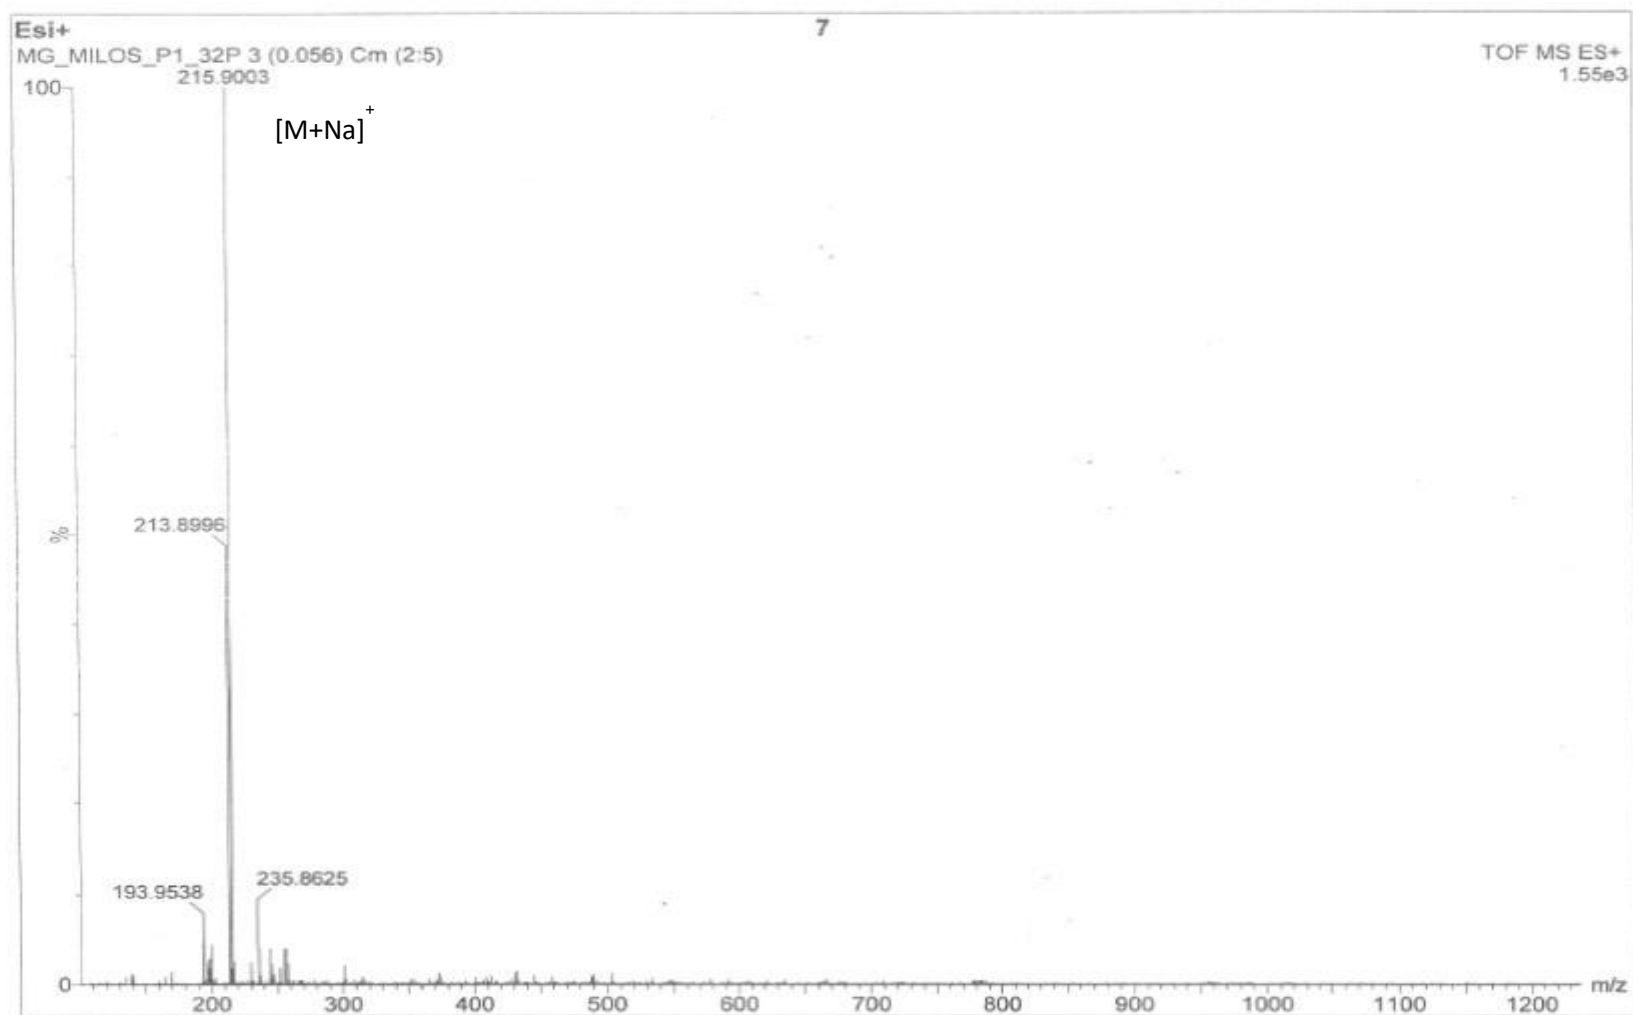

ESI-MS spectrum of uranidine (8)
